# Supplementary material
Source: MDPI journal article supplement (https://www.mdpi.com/2073-4441/15/12/2263)
Supplement: s1 [file s1]

## Article

# Fixed-Bed Studies of Landfill Leachate Treatment Using Chitosan-Coated Carbon Composite

Fatima Batool <sup>1,†</sup>, Tonni Agustiono Kurniawan <sup>1,2,\*</sup>, Ayesha Mohyuddin <sup>1</sup>, Mohd Hafiz Dzarfan Othman <sup>3</sup>, Abdelkader Anouzla <sup>4</sup>, Christia Meidiana <sup>5</sup>, Hui Hwang Goh <sup>6</sup> and Kit Wayne Chew <sup>7</sup>

<sup>1</sup> Department of Chemistry, School of Science, University of Management and Technology, Lahore 54770, Pakistan

<sup>2</sup> College of Environment and Ecology, Xiamen University, Xiamen 361102, China

<sup>3</sup> Advanced Membrane Technology Research Centre (AMTEC), Faculty of Chemical and Energy Engineering, Universiti Teknologi Malaysia (UTM), Skudai 81310, Johor Bahru, Malaysia

<sup>4</sup> Department of Process Engineering and Environment, Faculty of Science and Technology, University Hassan II of Casablanca, Mohammedia 28830, Morocco

<sup>5</sup> Department of Regional and Urban Planning, Faculty of Engineering, Brawijaya University, Malang 65145, Indonesia

<sup>6</sup> School of Electrical Engineering, Guangxi University, Nanning 530004, China

<sup>7</sup> School of Chemistry, Chemical Engineering and Biotechnology, Nanyang Technological University (NTU), Singapore 637459, Singapore

\* Correspondence: tonni@xmu.edu.cn

† The 1st and the 2nd authors equally contribute to this work and mutually share the first authorship.

**Citation:** Batool, F.; Kurniawan, T.A.; Mohyuddin, A.; Othman, M.H.D.; Anouzla, A.; Meidiana, C.; Goh, H.H.; Chew, K.W. Fixed-Bed Studies of Landfill Leachate Treatment Using Chitosan-Coated Carbon Composite. *Water* **2023**, *15*, x. <https://doi.org/10.3390/xxxxx>

Academic Editor: Chengyun Zhou

Received: 20 May 2023

Revised: 7 June 2023

Accepted: 14 June 2023

Published: 16 June 2023

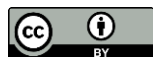

**Copyright:** © 2023 by the authors. Submitted for possible open access publication under the terms and conditions of the Creative Commons Attribution (CC BY) license (<https://creativecommons.org/licenses/by/4.0/>).

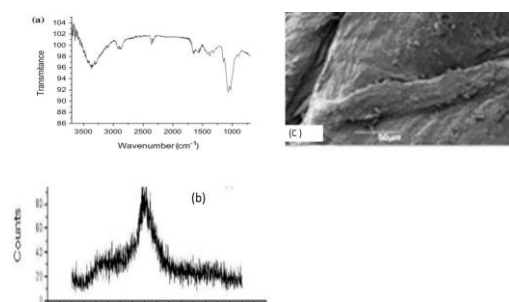

**Figure S1.** Characterization data of composite before column studies

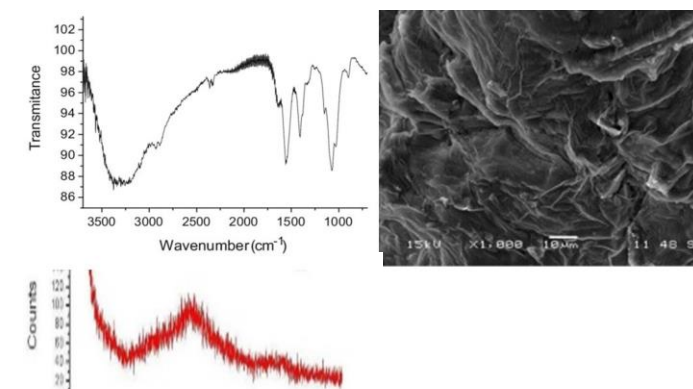

**Figure S2.** Characterization data of composite after column studies
